# Supplementary material for: The rRNA m6A methyltransferase METTL5 is involved in pluripotency and developmental programs
Source: PubMed Central journal article supplement — Genes Dev. 2020 May 1;34(9-10):715–29. doi: 10.1101/gad.333369.119 (PMC7197354; doi:10.1101/gad.333369.119), 2020-05-01
Supplement: supp_gad.333369.119_Supplemental_Fig_S1.pdf [file supp_gad.333369.119_Supplemental_Fig_S1.pdf]

Figure S1

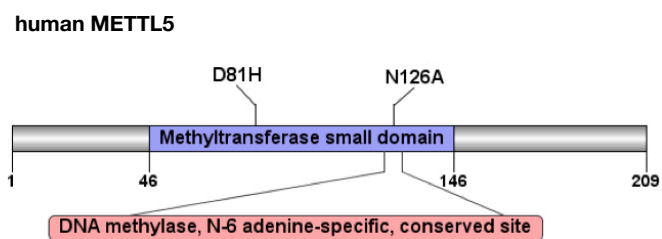

Figure S1. METTL5 catalyses m<sup>6</sup>A formation.

Domain structure of METTL5. Point mutations used in this study that disrupt catalytic activity are indicated.
