# Supplementary material for: The rRNA m6A methyltransferase METTL5 is involved in pluripotency and developmental programs
Source: PubMed Central journal article supplement — Genes Dev. 2020 May 1;34(9-10):715–29. doi: 10.1101/gad.333369.119 (PMC7197354; doi:10.1101/gad.333369.119), 2020-05-01
Supplement: supp_gad.333369.119_Supplemental_Fig_S2.pdf [file supp_gad.333369.119_Supplemental_Fig_S2.pdf]

Figure S2

a

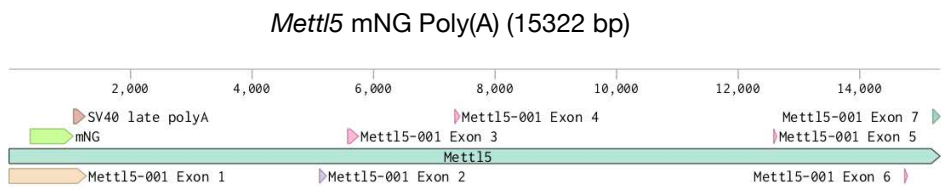

b

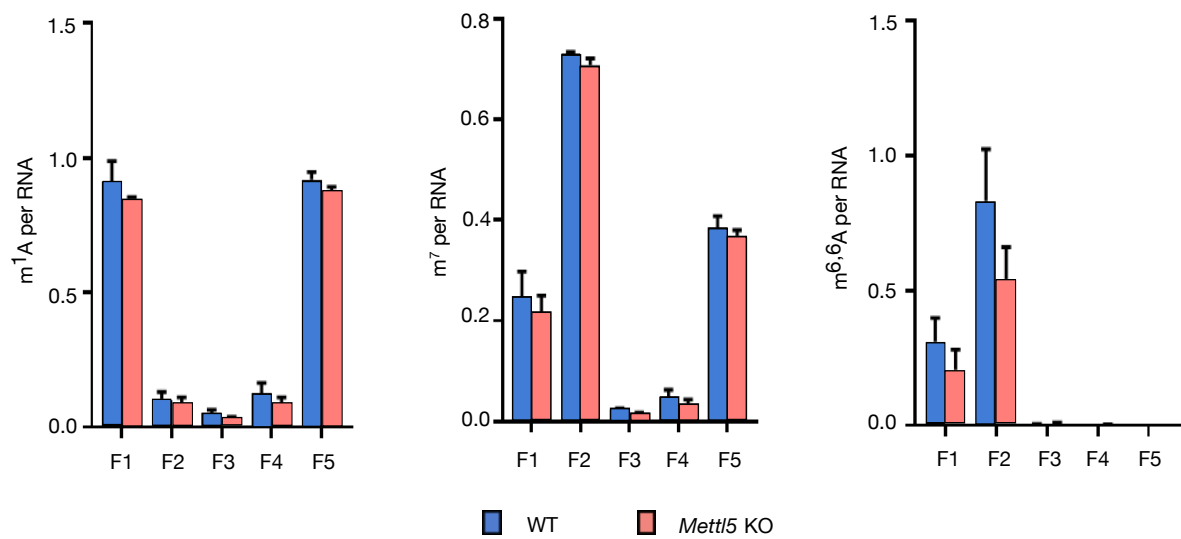

c

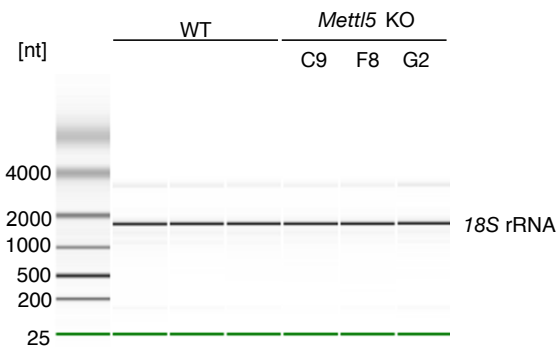

## Figure S2. METTL5 methylates 18S rRNA in mESCs.

- a. Schematic representation of the CRISPR/Cas9 gene editing strategy to create *Mettl5* KO mESCs. The KOs were created by inserting a mNeonGreen (mNG) PolyA cassette (green) into the first exon of the mouse *Mettl5* gene. See full description in the Material and Methods. The scheme was generated in Benchling (<https://benchling.com>).
- b. Quantification of modified nucleosides in indicated RNA fractions (see Figure 2c for fractionation details). Absolute quantification of modified nucleosides per respective RNA for 1-methyladenosine (m<sup>1</sup>A), 7-methylguanosine (m<sup>7</sup>G) and N6,N6-dimethyladenosine (m<sup>6,6</sup>A) (Borland et al. 2019) are plotted. Average of three biological replicates and standard deviations are shown.
- c. Bioanalyzer profiling of fraction F2 (from SEC experiment, Figure S2B) from wt and *Mettl5* KO mESCs (clones C9, F8, G2) used as substrates in the *in vitro* MTA with GFP-METTL5.
