# Supplementary material for: The rRNA m6A methyltransferase METTL5 is involved in pluripotency and developmental programs
Source: PubMed Central journal article supplement — Genes Dev. 2020 May 1;34(9-10):715–29. doi: 10.1101/gad.333369.119 (PMC7197354; doi:10.1101/gad.333369.119), 2020-05-01
Supplement: supp_gad.333369.119_Supplemental_Fig_S3.pdf [file supp_gad.333369.119_Supplemental_Fig_S3.pdf]

Figure S3

a

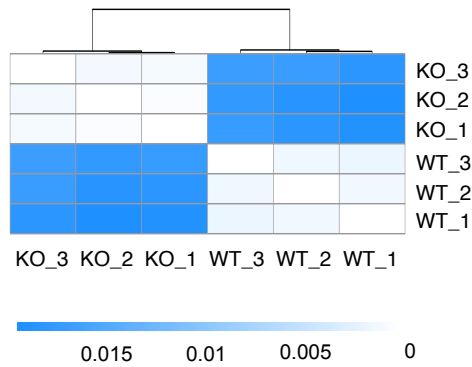

b

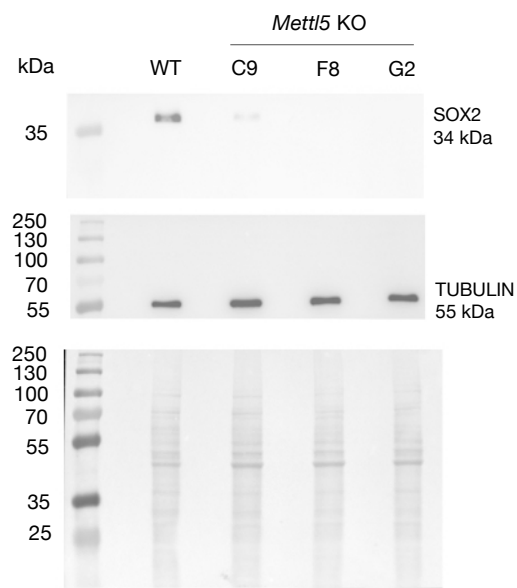

c

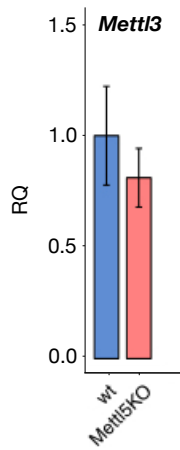

### Figure S3. *Mettl5* KO affects pluripotency of mESCs

- a. Heatmap displaying Jensen-Shannon divergence between pairs of RNAseq samples computed at the transcript level for wt and *Mettl5* KO mESC (Sleight package in R). The larger this value is, the more dissimilar the samples are. Related to Figure 3c.
- b. Immuno blot analysis of SOX2 protein level in total cell lysates from wt and *Mettl5* KO (clones C9, F8, G2) mESCs. Tubulin (middle panel) and Ponceau staining (lower panel) are shown as loading controls.
- c. qRT-PCR analysis of the expression levels of *Mettl3* in wt and *Mettl5* KO mESCs after 6 days in Serum-LIF media. Fold change quantified relative (RQ) to the wildtype is plotted. Error bars indicate the standard error on average RQ values of three wt and KO clones (C9, F8, G2).
