# Supplementary material for: The rRNA m6A methyltransferase METTL5 is involved in pluripotency and developmental programs
Source: PubMed Central journal article supplement — Genes Dev. 2020 May 1;34(9-10):715–29. doi: 10.1101/gad.333369.119 (PMC7197354; doi:10.1101/gad.333369.119), 2020-05-01
Supplement: supp_gad.333369.119_Supplemental_Fig_S5.pdf [file supp_gad.333369.119_Supplemental_Fig_S5.pdf]

Figure S5

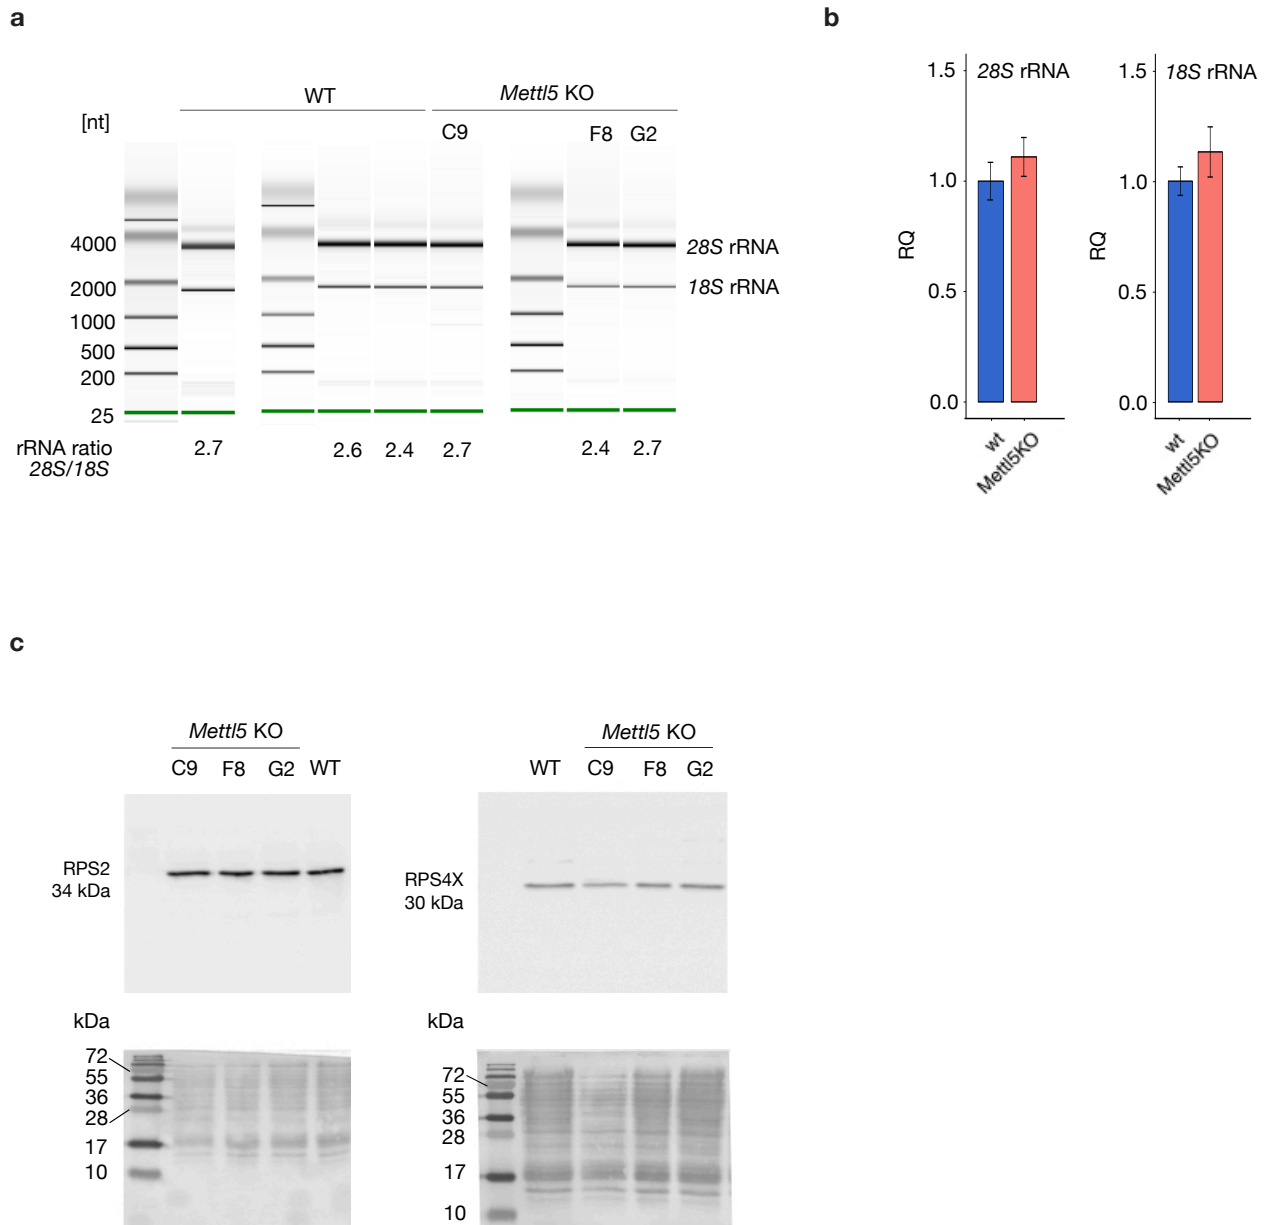

**Figure S5. Levels of ribosome components are largely unaltered in *Mettl5***

**KO mESCs**

a. Quantification of *28S* rRNA vs *18S* rRNA ratios by bioanalyzer profiling on total RNA from wt and *Mettl5* KO mESCs (clones C9, F8, G2). The ratio of *28S* RNA to *18S* RNA for three wt controls and three *Mettl5* KO clones is indicated at the bottom.

b. qRT-PCR analysis of the expression levels of *28S* (left) and *18S* rRNA (right) in *Mettl5* KO mESCs compared to wt mESCs after 6 days in Serum-LIF media. Plotted is the relative quantification (RQ) compared to wt displayed as fold change compared to wt. Error bars indicate the standard error on the average of RQ values of three independent KO clones (C9, F8, G2).

c. Immuno blot analysis of RPS2 (left) and RPS4X (right) proteins levels in total cell lysates from wt and *Mettl5* KO (clones C9, F8, G2) mESCs. Ponceau staining (bottom panel) is shown as a loading control.
