# Supplementary material for: The rRNA m6A methyltransferase METTL5 is involved in pluripotency and developmental programs
Source: PubMed Central journal article supplement — Genes Dev. 2020 May 1;34(9-10):715–29. doi: 10.1101/gad.333369.119 (PMC7197354; doi:10.1101/gad.333369.119), 2020-05-01
Supplement: supp_gad.333369.119_Supplemental_Fig_S6.pdf [file supp_gad.333369.119_Supplemental_Fig_S6.pdf]

Figure S6

a

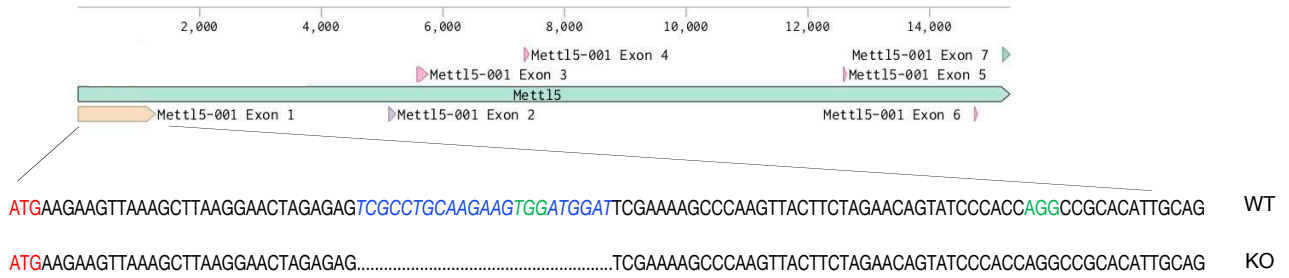

b

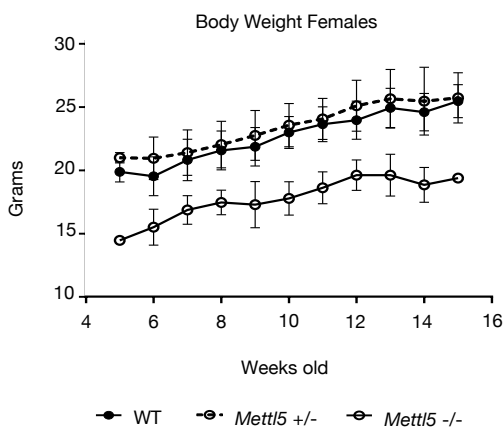

c

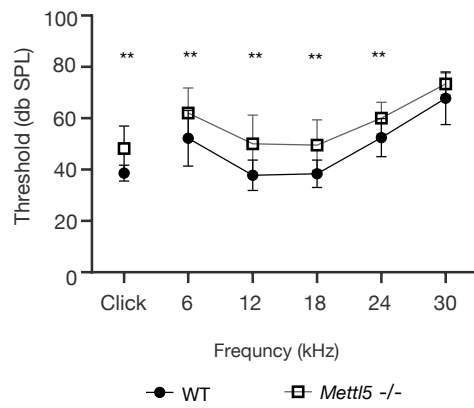

d

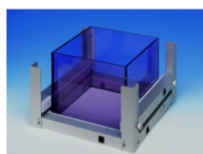

Test arena for Open Field test

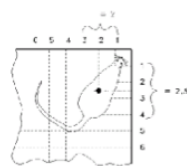

Calculating the center of gravity

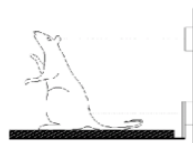

Detecting rearings

Locomotion: distance travelled (cm)  
 Exploration: vertical = rearings; horizontal = distance  
 Anxiety-related behaviour: time spent in the center (%)  
 Habituation: time course  
 Conditions: length: 45.5 x 45.5 cm, walls: 39.5 cm  
 150 - 200 lx, Center: 42%  
 Time: 20 min  
 Infrared beam breaks

**Figure S6. *Mettl5* KO mice show multiple phenotypes.**

a. Schematic representation of the CRISPR/Cas9 gene editing strategy to create *Mettl5* KO mice. The KO was created by a 23bp deletion in exon 1. The nucleotide sequences of wt and KO alleles are shown. The conventional start codon (ATG) is indicated in red. The excised fragment of 23 bp is indicated in blue and causes a frameshift mutation resulting in a stop codon in exon 2. See full description in the Material and Methods. The scheme was generated in Benchling (<https://benchling.com>).

b. Weight monitoring of mice from the age of 5 to 15 weeks showed significant differences (p-value 0,007) between female *Mettl5* KO and control animals (data are means  $\pm$  SD, n= 22 wt +/+, n=10 *Mettl5* +/-, n=3 *Mettl5* -/-).

c. Auditory Brainstem Response (ABR) was performed as previously described (Fuchs et al. 2018) by applying different sound stimuli to anesthetized mice and measuring sound pressure thresholds for eliciting a detectable ABR response. ABR curves of 14-week-old mice show increased thresholds of mutants indicative of reduced hearing sensitivity. \*\* p<0.01 by Wilcoxon rank-sum test; Data are means  $\pm$  SD, males and females pooled, n = 36 wt, n = 11 *Mettl5* KO.

d. Scheme of the open field test used in the experiment presented in Figure 5f. For details see material and methods and (Garrett et al. 2012).
